# Supplementary material for: Fungal Inositol Pyrophosphate IP7 Is Crucial for Metabolic Adaptation to the Host Environment and Pathogenicity
Source: PubMed Central journal article supplement — mBio. 2015 Jun 2;6(3):e00531-15. doi: 10.1128/mBio.00531-15 (PMC4453010; doi:10.1128/mbio.00531-15), 2015-06-02
Supplement: mbo003152346st3.pdf [file mbo003152346st3.pdf]

Table S3.

| Process                                                                  | GO number  | CNAG #     | Function                                                                                                                    | FPKM, WT | FPKM, kcs1 | Log2 (kcs1/WT) | Q-value | Significant |
|--------------------------------------------------------------------------|------------|------------|-----------------------------------------------------------------------------------------------------------------------------|----------|------------|----------------|---------|-------------|
| <b>Glycolysis and pyruvate decarboxylation (6 genes)</b>                 |            |            |                                                                                                                             |          |            |                |         | <b>4</b>    |
| biological_process                                                       | GO:0006096 | CNAG_03769 | hexokinase                                                                                                                  | 357.50   | 515.89     | 0.53           | 0.5841  |             |
| biological_process                                                       | GO:0006096 | CNAG_05480 | hexokinase                                                                                                                  | 65.67    | 149.86     | 1.19           | 0.0005  | yes         |
| biological_process                                                       | GO:0006096 | CNAG_04676 | 6-phosphofructokinase                                                                                                       | 22.91    | 103.29     | 2.17           | 0.0005  | yes         |
| biological_process                                                       | GO:0006096 | CNAG_01820 | pyruvate kinase                                                                                                             | 53.69    | 322.45     | 2.59           | 0.0005  | yes         |
| biological_process                                                       | GO:0008152 | CNAG_01120 | pyruvate dehydrogenase complex E2 component dihydrolipoamide acetyltransferase pyruvate dehydrogenase (acetyl-transferring) | 101.37   | 219.77     | 1.12           | 0.0005  | yes         |
| biological_process                                                       | GO:0008152 | CNAG_07660 | E1 component, alpha subunit                                                                                                 | 105.44   | 220.38     | 1.06           | 0.2379  |             |
| <b>Citric acid cycle (16 genes)</b>                                      |            |            |                                                                                                                             |          |            |                |         | <b>5</b>    |
| biological_process                                                       | GO:0006096 | CNAG_03225 | malate dehydrogenase, NAD-dependent                                                                                         | 542.05   | 393.71     | -0.46          | 0.1568  |             |
| biological_process                                                       | GO:0006096 | CNAG_03266 | malate dehydrogenase, NAD-dependent                                                                                         | 418.84   | 212.30     | -0.98          | 0.0005  |             |
| biological_process                                                       | GO:0044262 | CNAG_00061 | citrate synthase, mitochondrial                                                                                             | 351.42   | 251.37     | -0.48          | 0.2178  |             |
| biological_process                                                       | GO:0008152 | CNAG_07363 | isocitrate dehydrogenase, NAD-dependent                                                                                     | 187.56   | 194.13     | 0.05           | 0.9135  |             |
| biological_process                                                       | GO:0008152 | CNAG_07851 | isocitrate dehydrogenase, NAD-dependent                                                                                     | 232.39   | 221.89     | -0.07          | 0.8845  |             |
| biological_process                                                       | GO:0006099 | CNAG_01137 | aconitate hydratase, mitochondrial                                                                                          | 397.72   | 226.19     | -0.81          | 0.0084  |             |
| biological_process                                                       | GO:0006099 | CNAG_03226 | succinate dehydrogenase [ubiquinone] iron-sulfur subunit, mitochondrial                                                     | 637.58   | 299.74     | -1.09          | 0.0005  | yes         |
| biological_process                                                       | GO:0006099 | CNAG_03427 | aconitate hydratase, mitochondrial                                                                                          | 20.65    | 8.79       | -1.23          | 0.0005  | yes         |
| biological_process                                                       | GO:0006099 | CNAG_03596 | 2-oxoglutarate dehydrogenase E2 component (dihydrolipoamide succinyltransferase)                                            | 571.47   | 425.04     | -0.43          | 0.2248  |             |
| biological_process                                                       | GO:0006099 | CNAG_04189 | succinate dehydrogenase [ubiquinone] flavoprotein subunit, mitochondrial                                                    | 741.37   | 283.18     | -1.39          | 0.0005  | yes         |
| biological_process                                                       | GO:0006099 | CNAG_06723 | succinate dehydrogenase (ubiquinone) membrane anchor subunit                                                                | 1287.65  | 571.45     | -1.17          | 0.0005  | yes         |
| biological_process                                                       | GO:0006099 | CNAG_07356 | succinate dehydrogenase, cytochrome b556 subunit                                                                            | 875.97   | 421.19     | -1.06          | 0.0005  | yes         |
| biological_process                                                       | GO:0006099 | CNAG_07363 | isocitrate dehydrogenase, NAD-dependent                                                                                     | 187.56   | 194.13     | 0.05           | 0.9135  |             |
| biological_process                                                       | GO:0006099 | CNAG_07851 | isocitrate dehydrogenase, NAD-dependent                                                                                     | 232.39   | 221.89     | -0.07          | 0.8845  |             |
| biological_process                                                       | GO:0006099 | CNAG_07908 | aconitate hydratase, mitochondrial                                                                                          | 14.38    | 13.96      | -0.04          | 0.9328  |             |
| biological_process                                                       | GO:0006106 | CNAG_01657 | fumarate hydratase, mitochondrial                                                                                           | 181.56   | 248.63     | 0.45           | 0.1296  |             |
| <b>Fatty acid beta-oxidation and peroxisomal organisation (24 genes)</b> |            |            |                                                                                                                             |          |            |                |         | <b>18</b>   |
| biological_process                                                       | GO:0006635 | CNAG_07747 | acyl-CoA oxidase                                                                                                            | 99.86    | 21.78      | -2.20          | 0.0005  | yes         |
| biological_process                                                       | GO:0006810 | CNAG_02764 | ATP-binding cassette, subfamily D (ALD), peroxisomal long-chain fatty acid import protein                                   | 58.38    | 4.85       | -3.59          | 0.0005  | yes         |
| biological_process                                                       | GO:0008152 | CNAG_02562 | acyl-CoA dehydrogenase                                                                                                      | 114.58   | 9.03       | -3.66          | 0.0005  | yes         |
| biological_process                                                       | GO:0008152 | CNAG_03666 | acyl-CoA dehydrogenase                                                                                                      | 541.90   | 24.11      | -4.49          | 0.0005  | yes         |
| biological_process                                                       | GO:0008152 | CNAG_04688 | acyl-CoA dehydrogenase                                                                                                      | 199.96   | 25.38      | -2.98          | 0.0005  | yes         |
| biological_process                                                       | GO:0008152 | CNAG_04308 | 3-hydroxyacyl-CoA dehydrogenase Had1                                                                                        | 441.78   | 49.38      | -3.16          | 0.0005  | yes         |
| biological_process                                                       | GO:0008152 | CNAG_05378 | 3-hydroxyacyl-CoA dehydrogenase                                                                                             | 9.95     | 12.47      | 0.32           | 0.5101  |             |
| biological_process                                                       | GO:0006637 | CNAG_03393 | acyl-CoA thioesterase II                                                                                                    | 78.27    | 9.77       | -3.00          | 0.0005  | yes         |
| biological_process                                                       | GO:0006637 | CNAG_04274 | acyl-CoA thioesterase II                                                                                                    | 29.91    | 16.42      | -0.87          | 0.0016  |             |
| biological_process                                                       | GO:0008152 | CNAG_00861 | 3-hydroxyacyl-CoA dehydrogenase                                                                                             | 8.22     | 4.37       | -0.91          | 0.0162  |             |
| biological_process                                                       | GO:0006118 | CNAG_06431 | acyl-CoA oxidase                                                                                                            | 768.18   | 22.10      | -5.12          | 0.0005  | yes         |
| biological_process                                                       | GO:0008152 | CNAG_03010 | enoyl-CoA hydratase/isomerase family protein                                                                                | 516.44   | 22.25      | -4.54          | 0.0005  | yes         |
| biological_process                                                       | GO:0008152 | CNAG_04228 | 2,4-dienoyl-CoA reductase                                                                                                   | 95.26    | 16.77      | -2.51          | 0.0005  | yes         |
| biological_process                                                       | GO:0008152 | CNAG_04238 | peroxisomal 2,4-dienoyl-CoA reductase                                                                                       | 232.15   | 21.14      | -3.46          | 0.0005  | yes         |
| biological_process                                                       | GO:0008152 | CNAG_04531 | enoyl-CoA hydratase                                                                                                         | 1969.33  | 199.73     | -3.30          | 0.0005  | yes         |
| biological_process                                                       | GO:0008152 | CNAG_01947 | 2,4-dienoyl-CoA reductase                                                                                                   | 8.08     | 339.78     | 5.39           | 0.0005  | yes         |
| biological_process                                                       | GO:0008152 | CNAG_01135 | delta(3,5)-Delta(2,4)-dienoyl-CoA isomerase                                                                                 | 21.95    | 12.83      | -0.77          | 0.3261  |             |
| biological_process                                                       | GO:0007031 | CNAG_00171 | peroxin-2                                                                                                                   | 51.47    | 13.12      | -1.97          | 0.0005  | yes         |
| biological_process                                                       | GO:0007031 | CNAG_02939 | peroxin-3                                                                                                                   | 41.37    | 22.60      | -0.87          | 0.3996  |             |
| biological_process                                                       | GO:0007031 | CNAG_04937 | peroxin-12                                                                                                                  | 17.85    | 4.26       | -2.07          | 0.0005  | yes         |
| biological_process                                                       | GO:0007031 | CNAG_05564 | peroxin-10                                                                                                                  | 59.16    | 25.67      | -1.20          | 0.0005  | yes         |
| biological_process                                                       | GO:0007031 | CNAG_07403 | peroxin-1                                                                                                                   | 46.07    | 9.93       | -2.10          | 0.4260  |             |
| biological_process                                                       | GO:0008152 | CNAG_05721 | multifunctional beta-oxidation protein Mfe2                                                                                 | 370.16   | 17.62      | -4.39          | 0.0003  | yes         |
| biological_process                                                       | GO:0006631 | CNAG_03134 | 3-hydroxyacyl-CoA dehydrogenase Had2                                                                                        | 264.66   | 23.92      | -3.47          | 0.0003  | yes         |
| <b>Glyoxylate cycle and gluconeogenesis (5 genes)</b>                    |            |            |                                                                                                                             |          |            |                |         | <b>3</b>    |
| biological_process                                                       | GO:0005975 | CNAG_00057 | fructose-1,6-bisphosphatase I                                                                                               | 1105.45  | 815.94     | -0.44          | 0.3014  |             |
| biological_process                                                       | GO:0006094 | CNAG_04217 | phosphoenolpyruvate carboxykinase (PCK1)                                                                                    | 1103.07  | 54.26      | -4.35          | 0.0005  | yes         |

|                                                     |            |            |                                           |         |         |       |        |     |
|-----------------------------------------------------|------------|------------|-------------------------------------------|---------|---------|-------|--------|-----|
| biological_process                                  | GO:0006094 | CNAG_05907 | pyruvate carboxylase                      | 93.24   | 140.45  | 0.59  | 0.0559 |     |
| biological_process                                  | GO:0008152 | CNAG_05303 | isocitrate lyase                          | 1035.28 | 3.88    | -8.06 | 0.0005 | yes |
| biological_process                                  | GO:0006097 | CNAG_05653 | malate synthase A                         | 916.08  | 44.54   | -4.36 | 0.0005 | yes |
| <b>Translation/ribosomal biogenesis (160 genes)</b> |            |            |                                           |         |         |       |        |     |
| biological_process                                  | GO:0006412 | CNAG_00007 | methionine-tRNA ligase                    | 46.05   | 41.27   | -0.16 | 0.7637 |     |
| biological_process                                  | GO:0006412 | CNAG_00034 | large subunit ribosomal protein L9e       | 409.66  | 1581.66 | 1.95  | 0.0005 | yes |
| biological_process                                  | GO:0006412 | CNAG_00084 | glutamine-tRNA ligase                     | 13.99   | 25.79   | 0.88  | 0.0052 |     |
| biological_process                                  | GO:0006412 | CNAG_00109 | large subunit ribosomal protein L34       | 38.15   | 46.81   | 0.30  | 0.5121 |     |
| biological_process                                  | GO:0006412 | CNAG_00116 | small subunit ribosomal protein S3        | 141.03  | 452.63  | 1.68  | 0.0005 | yes |
|                                                     |            |            | phosphoribosylaminoimidazolesuccinocarbox |         |         |       |        |     |
| biological_process                                  | GO:0006412 | CNAG_00143 | amide synthase                            | 20.84   | 50.78   | 1.28  | 0.0012 | yes |
| biological_process                                  | GO:0006412 | CNAG_00232 | large subunit ribosomal protein L30e      | 1158.00 | 3145.83 | 1.44  | 0.0005 | yes |
| biological_process                                  | GO:0006412 | CNAG_00238 | isoleucine-tRNA ligase                    | 45.00   | 100.62  | 1.16  | 0.0005 | yes |
| biological_process                                  | GO:0006412 | CNAG_00347 | DEAH box polypeptide 36                   | 6.35    | 6.79    | 0.10  | 0.8799 |     |
| biological_process                                  | GO:0006412 | CNAG_00370 | polyubiquitin                             | 788.64  | 2141.44 | 1.44  | 0.0005 | yes |
| biological_process                                  | GO:0006412 | CNAG_00451 | cytoplasmic protein                       | 7.15    | 7.40    | 0.05  | 0.9318 |     |
| biological_process                                  | GO:0006412 | CNAG_00502 | large subunit ribosomal protein L35       | 69.29   | 83.34   | 0.27  | 0.4703 |     |
| biological_process                                  | GO:0006412 | CNAG_00535 | large subunit ribosomal protein L16       | 41.08   | 55.45   | 0.43  | 0.6481 |     |
| biological_process                                  | GO:0006412 | CNAG_00608 | hypothetical protein                      | 92.82   | 198.61  | 1.10  | 0.0368 | yes |
| biological_process                                  | GO:0006412 | CNAG_00640 | small subunit ribosomal protein S4-A      | 873.69  | 3002.20 | 1.78  | 0.0005 | yes |
| biological_process                                  | GO:0006412 | CNAG_00656 | large subunit ribosomal protein L7e       | 258.57  | 988.71  | 1.94  | 0.0005 | yes |
| biological_process                                  | GO:0006412 | CNAG_00672 | small subunit ribosomal protein S11       | 705.02  | 2654.13 | 1.91  | 0.0005 | yes |
| biological_process                                  | GO:0006412 | CNAG_00703 | large subunit ribosomal protein L31e      | 983.37  | 3293.43 | 1.74  | 0.0005 | yes |
| biological_process                                  | GO:0006412 | CNAG_00722 | large subunit ribosomal protein L27       | 106.98  | 143.41  | 0.42  | 0.4015 |     |
| biological_process                                  | GO:0006412 | CNAG_00771 | large subunit ribosomal protein L29       | 523.89  | 1851.66 | 1.82  | 0.0005 | yes |
| biological_process                                  | GO:0006412 | CNAG_00779 | large subunit ribosomal protein L27e      | 475.08  | 1680.87 | 1.82  | 0.0005 | yes |
| biological_process                                  | GO:0006412 | CNAG_00819 | small subunit ribosomal protein S30       | 1160.19 | 2471.15 | 1.09  | 0.0019 | yes |
| biological_process                                  | GO:0006412 | CNAG_00821 | large subunit ribosomal protein L34e      | 351.16  | 1072.11 | 1.61  | 0.0005 | yes |
| biological_process                                  | GO:0006412 | CNAG_01152 | small subunit ribosomal protein S6e       | 248.71  | 1057.11 | 2.09  | 0.0005 | yes |
| biological_process                                  | GO:0006412 | CNAG_01153 | small subunit ribosomal protein S13e      | 249.70  | 773.51  | 1.63  | 0.0005 | yes |
| biological_process                                  | GO:0006412 | CNAG_01170 | small subunit ribosomal protein S17       | 713.01  | 2555.58 | 1.84  | 0.0005 | yes |
| biological_process                                  | GO:0006412 | CNAG_01181 | small subunit ribosomal protein S27Ae     | 627.68  | 1938.31 | 1.63  | 0.0005 | yes |
| biological_process                                  | GO:0006412 | CNAG_01224 | large subunit ribosomal protein L18-A     | 592.26  | 2232.13 | 1.91  | 0.0005 | yes |
| biological_process                                  | GO:0006412 | CNAG_01300 | small subunit ribosomal protein S21e      | 223.73  | 716.02  | 1.68  | 0.0005 | yes |
| biological_process                                  | GO:0006412 | CNAG_01305 | methionine-tRNA ligase                    | 28.38   | 52.14   | 0.88  | 0.0012 |     |
| biological_process                                  | GO:0006412 | CNAG_01320 | large subunit ribosomal protein L17       | 44.88   | 59.48   | 0.41  | 0.3855 |     |
| biological_process                                  | GO:0006412 | CNAG_01332 | small subunit ribosomal protein S24e      | 387.57  | 1297.66 | 1.74  | 0.0005 | yes |
| biological_process                                  | GO:0006412 | CNAG_01345 | small subunit ribosomal protein S2        | 30.58   | 51.48   | 0.75  | 0.0082 |     |
| biological_process                                  | GO:0006412 | CNAG_01347 | co-chaperone                              | 142.94  | 96.93   | -0.56 | 0.0887 |     |
| biological_process                                  | GO:0006412 | CNAG_01435 | serine-tRNA ligase                        | 62.00   | 142.00  | 1.20  | 0.0005 | yes |
| biological_process                                  | GO:0006412 | CNAG_01455 | large subunit ribosomal protein L39       | 378.41  | 1234.32 | 1.71  | 0.0005 | yes |
| biological_process                                  | GO:0006412 | CNAG_01471 | hypothetical protein                      | 24.66   | 69.73   | 1.50  | 0.0005 | yes |
| biological_process                                  | GO:0006412 | CNAG_01480 | large subunit ribosomal protein L12       | 251.52  | 1740.10 | 2.79  | 0.0005 | yes |
| biological_process                                  | GO:0006412 | CNAG_01486 | large subunit ribosomal protein L15-A     | 340.05  | 1780.00 | 2.39  | 0.0005 | yes |
| biological_process                                  | GO:0006412 | CNAG_01522 | phenylalanine-tRNA ligase                 | 21.06   | 75.09   | 1.83  | 0.0005 | yes |
| biological_process                                  | GO:0006412 | CNAG_01544 | histidyl-tRNA synthetase                  | 67.53   | 175.88  | 1.38  | 0.0005 | yes |
| biological_process                                  | GO:0006412 | CNAG_01590 | large subunit ribosomal protein L32       | 57.82   | 207.59  | 1.84  | 0.0005 | yes |
| biological_process                                  | GO:0006412 | CNAG_01599 | hypothetical protein                      | 14.03   | 41.69   | 1.57  | 0.1087 |     |
| biological_process                                  | GO:0006412 | CNAG_01628 | small subunit ribosomal protein S20       | 348.23  | 2181.06 | 2.65  | 0.0005 | yes |
| biological_process                                  | GO:0006412 | CNAG_01650 | large subunit ribosomal protein L7        | 14.54   | 43.34   | 1.58  | 0.0005 | yes |
| biological_process                                  | GO:0006412 | CNAG_01679 | small subunit ribosomal protein S15       | 70.98   | 170.30  | 1.26  | 0.0231 | yes |
| biological_process                                  | GO:0006412 | CNAG_01812 | large subunit ribosomal protein L24e      | 45.35   | 121.98  | 1.43  | 0.0118 | yes |
| biological_process                                  | GO:0006412 | CNAG_01819 | large subunit ribosomal protein L1        | 9.35    | 63.05   | 2.75  | 0.0019 | yes |
| biological_process                                  | GO:0006412 | CNAG_01884 | large subunit ribosomal protein L3        | 252.31  | 1535.19 | 2.61  | 0.0005 | yes |
| biological_process                                  | GO:0006412 | CNAG_01894 | aspartate-tRNA ligase                     | 9.71    | 38.45   | 1.98  | 0.3853 |     |
| biological_process                                  | GO:0006412 | CNAG_01951 | small subunit ribosomal protein S22-A     | 451.56  | 2685.76 | 2.57  | 0.0005 | yes |
| biological_process                                  | GO:0006412 | CNAG_01974 | large subunit ribosomal protein L36       | 54.00   | 98.62   | 0.87  | 0.2034 |     |
| biological_process                                  | GO:0006412 | CNAG_01976 | large subunit ribosomal protein L23       | 403.58  | 2473.50 | 2.62  | 0.0005 | yes |
| biological_process                                  | GO:0006412 | CNAG_01990 | small subunit ribosomal protein S5        | 730.34  | 5192.73 | 2.83  | 0.0005 | yes |
| biological_process                                  | GO:0006412 | CNAG_02037 | large subunit ribosomal protein L22       | 20.04   | 25.03   | 0.32  | 0.8750 |     |
| biological_process                                  | GO:0006412 | CNAG_02136 | small subunit ribosomal protein S6        | 147.70  | 246.33  | 0.74  | 0.0097 |     |
| biological_process                                  | GO:0006412 | CNAG_02144 | large subunit ribosomal protein L1-A      | 461.31  | 1525.44 | 1.73  | 0.0005 | yes |
| biological_process                                  | GO:0006412 | CNAG_02234 | large subunit ribosomal protein L6e       | 225.28  | 759.48  | 1.75  | 0.0005 | yes |
| biological_process                                  | GO:0006412 | CNAG_02330 | large subunit ribosomal protein L21e      | 107.87  | 452.41  | 2.07  | 0.0183 | yes |
| biological_process                                  | GO:0006412 | CNAG_02331 | small subunit ribosomal protein S9        | 815.88  | 3369.79 | 2.05  | 0.0009 | yes |
| biological_process                                  | GO:0006412 | CNAG_02354 | large subunit ribosomal protein L2        | 25.20   | 45.42   | 0.85  | 0.1226 |     |

|                    |            |            |                                                                                                                      |        |         |       |        |     |
|--------------------|------------|------------|----------------------------------------------------------------------------------------------------------------------|--------|---------|-------|--------|-----|
| biological_process | GO:0006412 | CNAG_02418 | asparagine-tRNA ligase                                                                                               | 22.81  | 79.49   | 1.80  | 0.0005 | yes |
| biological_process | GO:0006412 | CNAG_02709 | small subunit ribosomal protein S19                                                                                  | 66.30  | 91.74   | 0.47  | 0.2004 |     |
| biological_process | GO:0006412 | CNAG_02754 | small subunit ribosomal protein S12e                                                                                 | 960.85 | 3408.42 | 1.83  | 0.0005 | yes |
| biological_process | GO:0006412 | CNAG_02763 | phenylalanine-tRNA ligase, beta subunit                                                                              | 19.53  | 39.90   | 1.03  | 0.0869 |     |
| biological_process | GO:0006412 | CNAG_02811 | small subunit ribosomal protein S29                                                                                  | 879.63 | 3252.14 | 1.89  | 0.0005 | yes |
| biological_process | GO:0006412 | CNAG_02813 | large subunit ribosomal protein L30                                                                                  | 185.64 | 190.28  | 0.04  | 0.9436 |     |
| biological_process | GO:0006412 | CNAG_02838 | small subunit ribosomal protein S17                                                                                  | 42.45  | 62.37   | 0.56  | 0.0794 |     |
| biological_process | GO:0006412 | CNAG_02914 | hypothetical protein                                                                                                 | 15.90  | 23.45   | 0.56  | 0.0891 |     |
| biological_process | GO:0006412 | CNAG_02923 | large subunit ribosomal protein L14                                                                                  | 79.00  | 101.16  | 0.36  | 0.2803 |     |
| biological_process | GO:0006412 | CNAG_02928 | large subunit ribosomal protein L5e                                                                                  | 229.13 | 778.62  | 1.76  | 0.0005 | yes |
| biological_process | GO:0006412 | CNAG_03000 | small subunit ribosomal protein S19e                                                                                 | 704.36 | 2456.32 | 1.80  | 0.0005 | yes |
| biological_process | GO:0006412 | CNAG_03015 | large subunit ribosomal protein L37-A                                                                                | 427.00 | 1315.86 | 1.62  | 0.0005 | yes |
| biological_process | GO:0006412 | CNAG_03053 | large subunit ribosomal protein L23                                                                                  | 264.37 | 1027.98 | 1.96  | 0.0005 | yes |
| biological_process | GO:0006412 | CNAG_03127 | small subunit ribosomal protein S23                                                                                  | 948.13 | 2100.79 | 1.15  | 0.0005 | yes |
| biological_process | GO:0006412 | CNAG_03221 | large subunit ribosomal protein L29                                                                                  | 824.08 | 2749.61 | 1.74  | 0.0005 | yes |
| biological_process | GO:0006412 | CNAG_03260 | large subunit ribosomal protein L6                                                                                   | 34.41  | 47.24   | 0.46  | 0.2481 |     |
| biological_process | GO:0006412 | CNAG_03283 | large subunit ribosomal protein L24e                                                                                 | 353.83 | 1272.54 | 1.85  | 0.0005 | yes |
| biological_process | GO:0006412 | CNAG_03303 | small subunit ribosomal protein S27                                                                                  | 368.07 | 962.36  | 1.39  | 0.0005 | yes |
| biological_process | GO:0006412 | CNAG_03320 | mannose-1-phosphate guanylyltransferase                                                                              | 28.31  | 24.18   | -0.23 | 0.8319 |     |
| biological_process | GO:0006412 | CNAG_03353 | hypothetical protein                                                                                                 | 37.46  | 80.45   | 1.10  | 0.0005 | yes |
| biological_process | GO:0006412 | CNAG_03441 | small subunit ribosomal protein S21                                                                                  | 33.68  | 44.73   | 0.41  | 0.2462 |     |
| biological_process | GO:0006412 | CNAG_03457 | arginine-tRNA ligase                                                                                                 | 32.05  | 96.83   | 1.59  | 0.0005 | yes |
| biological_process | GO:0006412 | CNAG_03510 | large subunit ribosomal protein L36e                                                                                 | 398.27 | 973.00  | 1.29  | 0.0116 | yes |
| biological_process | GO:0006412 | CNAG_03540 | aspartyl/glutamyl-tRNA(Asn/Gln)<br>amidotransferase, B subunit<br>coatomer protein complex, subunit alpha<br>(xenin) | 26.87  | 24.36   | -0.14 | 0.7653 |     |
| biological_process | GO:0006412 | CNAG_03554 |                                                                                                                      | 73.62  | 99.61   | 0.44  | 0.1884 |     |
| biological_process | GO:0006412 | CNAG_03563 | aspartate-tRNA(Asn) ligase                                                                                           | 58.17  | 101.52  | 0.80  | 0.0116 |     |
| biological_process | GO:0006412 | CNAG_03693 | large subunit ribosomal protein L11                                                                                  | 119.94 | 122.81  | 0.03  | 0.9607 |     |
| biological_process | GO:0006412 | CNAG_03739 | large subunit ribosomal protein L10-like                                                                             | 778.27 | 1867.45 | 1.26  | 0.0005 | yes |
| biological_process | GO:0006412 | CNAG_03747 | large subunit ribosomal protein L27Ae                                                                                | 427.83 | 1536.99 | 1.85  | 0.0005 | yes |
| biological_process | GO:0006412 | CNAG_03779 | large subunit ribosomal protein L4                                                                                   | 16.80  | 18.97   | 0.18  | 0.8437 |     |
| biological_process | GO:0006412 | CNAG_03780 | small subunit ribosomal protein S16                                                                                  | 364.78 | 1325.08 | 1.86  | 0.0005 | yes |
| biological_process | GO:0006412 | CNAG_03793 | hypothetical protein                                                                                                 | 77.83  | 55.99   | -0.48 | 0.6021 |     |
| biological_process | GO:0006412 | CNAG_03810 | large subunit ribosomal protein L13                                                                                  | 173.98 | 162.92  | -0.09 | 0.8589 |     |
| biological_process | GO:0006412 | CNAG_03965 | ribosome recycling factor                                                                                            | 131.36 | 101.88  | -0.37 | 0.2520 |     |
| biological_process | GO:0006412 | CNAG_04004 | small subunit ribosomal protein S1                                                                                   | 908.90 | 3097.77 | 1.77  | 0.0005 | yes |
| biological_process | GO:0006412 | CNAG_04011 | large subunit ribosomal protein L37a                                                                                 | 733.09 | 2774.04 | 1.92  | 0.0005 | yes |
| biological_process | GO:0006412 | CNAG_04021 | large subunit ribosomal protein L24                                                                                  | 377.46 | 1361.80 | 1.85  | 0.0005 | yes |
| biological_process | GO:0006412 | CNAG_04068 | large subunit ribosomal protein L28e                                                                                 | 111.92 | 446.05  | 1.99  | 0.0005 | yes |
| biological_process | GO:0006412 | CNAG_04082 | proline-tRNA ligase                                                                                                  | 29.30  | 68.56   | 1.23  | 0.0055 | yes |
| biological_process | GO:0006412 | CNAG_04114 | small subunit ribosomal protein S0                                                                                   | 51.66  | 283.79  | 2.46  | 0.0005 | yes |
| biological_process | GO:0006412 | CNAG_04179 | lysine-tRNA ligase                                                                                                   | 46.15  | 88.73   | 0.94  | 0.0012 |     |
| biological_process | GO:0006412 | CNAG_04180 | large subunit ribosomal protein L15                                                                                  | 74.92  | 121.53  | 0.70  | 0.0537 |     |
| biological_process | GO:0006412 | CNAG_04292 | hypothetical protein                                                                                                 | 25.93  | 44.75   | 0.79  | 0.0055 |     |
| biological_process | GO:0006412 | CNAG_04400 | small subunit ribosomal protein S10                                                                                  | 26.41  | 36.43   | 0.46  | 0.7522 |     |
| biological_process | GO:0006412 | CNAG_04445 | small subunit ribosomal protein S7e                                                                                  | 377.54 | 1451.02 | 1.94  | 0.0005 | yes |
| biological_process | GO:0006412 | CNAG_04448 | large subunit ribosomal protein L19e                                                                                 | 639.40 | 1988.41 | 1.64  | 0.0005 | yes |
| biological_process | GO:0006412 | CNAG_04452 | small subunit ribosomal protein S18                                                                                  | 59.02  | 84.64   | 0.52  | 0.2463 |     |
| biological_process | GO:0006412 | CNAG_04604 | tryptophan-tRNA ligase<br>general transcription factor 3C polypeptide 3<br>(transcription factor C subunit 4)        | 39.36  | 66.66   | 0.76  | 0.0029 |     |
| biological_process | GO:0006412 | CNAG_04641 |                                                                                                                      | 15.57  | 14.48   | -0.11 | 0.8132 |     |
| biological_process | GO:0006412 | CNAG_04726 | large subunit ribosomal protein L18Ae                                                                                | 432.49 | 1639.13 | 1.92  | 0.0005 | yes |
| biological_process | GO:0006412 | CNAG_04762 | large subunit ribosomal protein L4e                                                                                  | 165.05 | 540.16  | 1.71  | 0.0005 | yes |
| biological_process | GO:0006412 | CNAG_04799 | large subunit ribosomal protein L14e                                                                                 | 391.89 | 1499.48 | 1.94  | 0.0005 | yes |
| biological_process | GO:0006412 | CNAG_04800 | phenylalanine-tRNA ligase, alpha subunit                                                                             | 109.18 | 125.86  | 0.21  | 0.5653 |     |
| biological_process | GO:0006412 | CNAG_04830 | large subunit ribosomal protein L33                                                                                  | 234.78 | 219.34  | -0.10 | 0.8555 |     |
| biological_process | GO:0006412 | CNAG_04883 | small subunit ribosomal protein S18                                                                                  | 467.59 | 1451.03 | 1.63  | 0.0005 | yes |
| biological_process | GO:0006412 | CNAG_04884 | large subunit ribosomal protein L44                                                                                  | 861.38 | 2589.57 | 1.59  | 0.0005 | yes |
| biological_process | GO:0006412 | CNAG_04896 | tyrosine-tRNA ligase                                                                                                 | 19.78  | 24.76   | 0.32  | 0.6314 |     |
| biological_process | GO:0006412 | CNAG_05110 | small subunit ribosomal protein S13                                                                                  | 68.67  | 87.09   | 0.34  | 0.3321 |     |
| biological_process | GO:0006412 | CNAG_05232 | large subunit ribosomal protein L8                                                                                   | 615.30 | 2054.82 | 1.74  | 0.0005 | yes |
| biological_process | GO:0006412 | CNAG_05507 | small subunit ribosomal protein S8                                                                                   | 252.54 | 258.01  | 0.03  | 0.9503 |     |
| biological_process | GO:0006412 | CNAG_05525 | small subunit ribosomal protein S26                                                                                  | 864.06 | 2659.91 | 1.62  | 0.0005 | yes |
| biological_process | GO:0006412 | CNAG_05530 | hypothetical protein                                                                                                 | 39.36  | 40.61   | 0.05  | 0.9405 |     |
| biological_process | GO:0006412 | CNAG_05555 | large subunit ribosomal protein L7Ae                                                                                 | 411.68 | 1566.88 | 1.93  | 0.0005 | yes |

|                                      |            |            |                                                                                     |         |         |       |        |           |
|--------------------------------------|------------|------------|-------------------------------------------------------------------------------------|---------|---------|-------|--------|-----------|
| biological_process                   | GO:0006412 | CNAG_05556 | hypothetical protein                                                                | 492.31  | 1882.61 | 1.94  | 0.0047 | yes       |
| biological_process                   | GO:0006412 | CNAG_05580 | hypothetical protein                                                                | 4.22    | 2.64    | -0.68 | 0.7885 |           |
| biological_process                   | GO:0006412 | CNAG_05635 | large subunit ribosomal protein L19                                                 | 22.19   | 27.94   | 0.33  | 0.7345 |           |
| biological_process                   | GO:0006412 | CNAG_05722 | alanine-tRNA ligase                                                                 | 60.30   | 72.30   | 0.26  | 0.5626 |           |
| biological_process                   | GO:0006412 | CNAG_05764 | small subunit ribosomal protein S5                                                  | 60.52   | 72.46   | 0.26  | 0.6730 |           |
| biological_process                   | GO:0006412 | CNAG_05800 | large subunit ribosomal protein L33-b<br>minichromosome maintenance protein 7 (cell | 276.78  | 1066.97 | 1.95  | 0.0005 | yes       |
| biological_process                   | GO:0006412 | CNAG_05825 | division control protein 47)                                                        | 9.27    | 37.65   | 2.02  | 0.0005 | yes       |
| biological_process                   | GO:0006412 | CNAG_05900 | glycine-tRNA ligase                                                                 | 47.46   | 91.12   | 0.94  | 0.0005 |           |
| biological_process                   | GO:0006412 | CNAG_05904 | small subunit ribosomal protein S14                                                 | 285.08  | 983.23  | 1.79  | 0.0005 | yes       |
| biological_process                   | GO:0006412 | CNAG_05978 | glutamate-tRNA ligase                                                               | 60.67   | 92.26   | 0.60  | 0.0279 |           |
| biological_process                   | GO:0006412 | CNAG_05980 | large subunit ribosomal protein L7/L12                                              | 44.14   | 83.21   | 0.91  | 0.0019 |           |
| biological_process                   | GO:0006412 | CNAG_06095 | large subunit ribosomal protein L13e                                                | 510.02  | 1924.22 | 1.92  | 0.0005 | yes       |
| biological_process                   | GO:0006412 | CNAG_06123 | leucine-tRNA ligase                                                                 | 24.92   | 75.31   | 1.60  | 0.0005 | yes       |
| biological_process                   | GO:0006412 | CNAG_06222 | large subunit ribosomal protein L32e                                                | 1475.33 | 5286.23 | 1.84  | 0.0005 | yes       |
| biological_process                   | GO:0006412 | CNAG_06231 | large subunit ribosomal protein L13                                                 | 139.83  | 569.85  | 2.03  | 0.0005 | yes       |
| biological_process                   | GO:0006412 | CNAG_06441 | isoleucine-tRNA ligase                                                              | 19.18   | 25.00   | 0.38  | 0.2262 |           |
| biological_process                   | GO:0006412 | CNAG_06447 | large subunit ribosomal protein L22                                                 | 274.94  | 1148.69 | 2.06  | 0.0005 | yes       |
| biological_process                   | GO:0006412 | CNAG_06471 | small subunit ribosomal protein S12                                                 | 33.97   | 43.28   | 0.35  | 0.3608 |           |
| biological_process                   | GO:0006412 | CNAG_06535 | ribosome biogenesis protein UTP30                                                   | 15.73   | 29.58   | 0.91  | 0.0023 |           |
| biological_process                   | GO:0006412 | CNAG_06605 | small subunit ribosomal protein S2                                                  | 194.20  | 849.49  | 2.13  | 0.0005 | yes       |
| biological_process                   | GO:0006412 | CNAG_06633 | small subunit ribosomal protein S15                                                 | 853.07  | 2933.37 | 1.78  | 0.0005 | yes       |
| biological_process                   | GO:0006412 | CNAG_06713 | cysteine-tRNA ligase                                                                | 12.09   | 26.59   | 1.14  | 0.2149 |           |
| biological_process                   | GO:0006412 | CNAG_06748 | U3 small nucleolar RNA-associated protein 7                                         | 19.59   | 19.01   | -0.04 | 0.9320 |           |
| biological_process                   | GO:0006412 | CNAG_06755 | threonine-tRNA ligase                                                               | 36.71   | 78.70   | 1.10  | 0.0005 | yes       |
| biological_process                   | GO:0006412 | CNAG_06763 | serine-tRNA ligase                                                                  | 13.42   | 13.96   | 0.06  | 0.9114 |           |
| biological_process                   | GO:0006412 | CNAG_06811 | large subunit ribosomal protein L22e                                                | 277.11  | 1053.36 | 1.93  | 0.0005 | yes       |
| biological_process                   | GO:0006412 | CNAG_06847 | small subunit ribosomal protein S28                                                 | 959.01  | 2965.93 | 1.63  | 0.0005 | yes       |
| biological_process                   | GO:0006412 | CNAG_07309 | mRNA surveillance protein pelota                                                    | 68.24   | 136.39  | 1.00  | 0.0005 |           |
| biological_process                   | GO:0006412 | CNAG_07400 | aspartate-tRNA(Asn) ligase                                                          | 83.32   | 111.59  | 0.42  | 0.1507 |           |
| biological_process                   | GO:0006412 | CNAG_07429 | asparagine-tRNA ligase                                                              | 19.83   | 25.46   | 0.36  | 0.2854 |           |
| biological_process                   | GO:0006412 | CNAG_07473 | valine-tRNA ligase                                                                  | 39.11   | 53.14   | 0.44  | 0.1296 |           |
| biological_process                   | GO:0006412 | CNAG_07535 | small subunit ribosomal protein S16                                                 | 21.11   | 31.01   | 0.55  | 0.1691 |           |
| biological_process                   | GO:0006412 | CNAG_07563 | glutamate-tRNA ligase                                                               | 19.57   | 29.94   | 0.61  | 0.1560 |           |
| biological_process                   | GO:0006412 | CNAG_07637 | large subunit ribosomal protein L3                                                  | 83.99   | 125.24  | 0.58  | 0.3869 |           |
| biological_process                   | GO:0006412 | CNAG_07778 | translation initiation factor 2 subunit 1                                           | 111.25  | 198.97  | 0.84  | 0.0016 |           |
| biological_process                   | GO:0006412 | CNAG_07839 | large subunit ribosomal protein L11                                                 | 786.94  | 2681.61 | 1.77  | 0.0005 | yes       |
| <b>Sugar transporters (51 genes)</b> |            |            |                                                                                     |         |         |       |        | <b>23</b> |
| molecular_function                   | GO:0005351 | CNAG_00048 | sugar transporter                                                                   | 11.79   | 1.82    | -2.70 | 0.0005 | yes       |
|                                      |            |            | MFS transporter, SP family, solute carrier                                          |         |         |       |        |           |
|                                      |            |            | family 2 (myo-inositol transporter), member                                         |         |         |       |        |           |
| molecular_function                   | GO:0005351 | CNAG_00097 | 13                                                                                  | 10.82   | 10.32   | -0.07 | 0.9351 |           |
|                                      |            |            | MFS transporter, SP family, solute carrier                                          |         |         |       |        |           |
|                                      |            |            | family 2 (myo-inositol transporter), member                                         |         |         |       |        | yes       |
| molecular_function                   | GO:0005351 | CNAG_00864 | 13                                                                                  | 15.32   | 1.03    | -3.90 | 0.0125 |           |
|                                      |            |            | MFS transporter, SP family, solute carrier                                          |         |         |       |        |           |
|                                      |            |            | family 2 (myo-inositol transporter), member                                         |         |         |       |        |           |
| molecular_function                   | GO:0005351 | CNAG_00867 | 13                                                                                  | 1.62    | 0.44    | -1.87 | 0.5069 |           |
| molecular_function                   | GO:0005351 | CNAG_01683 | monosaccharide transporter                                                          | 120.56  | 348.82  | 1.53  | 0.0005 |           |
| molecular_function                   | GO:0005351 | CNAG_01835 | hypothetical protein                                                                | 81.67   | 53.74   | -0.60 | 0.0279 |           |
| molecular_function                   | GO:0005351 | CNAG_01862 | hexose transporter                                                                  | 7.53    | 1.22    | -2.63 | 0.0959 |           |
| molecular_function                   | GO:0005351 | CNAG_01936 | sugar transporter                                                                   | 130.18  | 6.90    | -4.24 | 0.0005 | yes       |
| molecular_function                   | GO:0005351 | CNAG_02254 | quininate permease                                                                  | 25.95   | 5.16    | -2.33 | 0.0005 | yes       |
| molecular_function                   | GO:0005351 | CNAG_02479 | monosaccharide transporter                                                          | 3.87    | 4.82    | 0.32  | 0.4528 |           |
| molecular_function                   | GO:0005351 | CNAG_02554 | sugar transporter                                                                   | 9.73    | 6.68    | -0.54 | 0.1240 |           |
| molecular_function                   | GO:0005351 | CNAG_02733 | monosaccharide transporter                                                          | 18.69   | 1.27    | -3.88 | 0.0077 | yes       |
| molecular_function                   | GO:0005351 | CNAG_03087 | maltose permease                                                                    | 1.26    | 0.38    | -1.72 | 1.0000 |           |
| molecular_function                   | GO:0005351 | CNAG_03320 | mannose-1-phosphate guanylyltransferase                                             | 28.31   | 24.18   | -0.23 | 0.8319 |           |
| molecular_function                   | GO:0005351 | CNAG_03432 | solute carrier family 2                                                             | 36.41   | 15.49   | -1.23 | 0.1396 |           |
| molecular_function                   | GO:0005351 | CNAG_03438 | hexose transporter                                                                  | 118.98  | 1025.80 | 3.11  | 0.0005 |           |
| molecular_function                   | GO:0005351 | CNAG_03772 | glucose transporter                                                                 | 687.02  | 13.25   | -5.70 | 0.0005 | yes       |
| molecular_function                   | GO:0005351 | CNAG_03910 | D-xylose-proton symporter                                                           | 239.02  | 20.04   | -3.58 | 0.0005 | yes       |
| molecular_function                   | GO:0005351 | CNAG_04024 | sugar transporter                                                                   | 33.90   | 8.27    | -2.03 | 0.0005 | yes       |
| molecular_function                   | GO:0005351 | CNAG_04038 | MFS quininate transporter QutD                                                      | 12.92   | 10.07   | -0.36 | 0.3294 |           |
| molecular_function                   | GO:0005351 | CNAG_04092 | sugar transporter                                                                   | 14.88   | 1.94    | -2.94 | 0.0005 | yes       |

|                    |            |            |                                             |         |        |       |        |  |     |
|--------------------|------------|------------|---------------------------------------------|---------|--------|-------|--------|--|-----|
|                    |            |            | MFS transporter, SP family, general alpha   |         |        |       |        |  |     |
| molecular_function | GO:0005351 | CNAG_04210 | glucoside:H symporter                       | 43.30   | 57.36  | 0.41  | 0.1781 |  |     |
| molecular_function | GO:0005351 | CNAG_04552 | hypothetical protein                        | 0.93    | 0.21   | -2.17 | 1.0000 |  |     |
| molecular_function | GO:0005351 | CNAG_04783 | monosaccharide transporter                  | 20.66   | 33.31  | 0.69  | 0.0166 |  |     |
| molecular_function | GO:0005351 | CNAG_04784 | monosaccharide transporter                  | 1.78    | 0.52   | -1.78 | 0.4783 |  |     |
| molecular_function | GO:0005351 | CNAG_04920 | galactose transporter                       | 17.34   | 44.37  | 1.36  | 0.0055 |  |     |
| molecular_function | GO:0005351 | CNAG_04938 | hypothetical protein                        | 117.25  | 163.60 | 0.48  | 0.2883 |  |     |
|                    |            |            | solute carrier family 35 (UDP-sugar         |         |        |       |        |  |     |
| molecular_function | GO:0005351 | CNAG_05139 | transporter), member A1/2/3                 | 18.88   | 21.26  | 0.17  | 0.7548 |  |     |
| molecular_function | GO:0005351 | CNAG_05324 | sugar transporter                           | 3.08    | 0.42   | -2.88 | 0.0005 |  | yes |
|                    |            |            | MFS transporter, SP family, general alpha   |         |        |       |        |  |     |
| molecular_function | GO:0005351 | CNAG_05330 | glucoside:H symporter                       | 0.22    | 0.21   | -0.07 | 1.0000 |  |     |
| molecular_function | GO:0005351 | CNAG_05336 | glucose transporter                         | 35.21   | 5.18   | -2.77 | 0.0026 |  | yes |
| molecular_function | GO:0005351 | CNAG_05340 | monosaccharide transporter                  | 26.39   | 2.97   | -3.15 | 0.4952 |  |     |
|                    |            |            | MFS transporter, SP family, solute carrier  |         |        |       |        |  |     |
|                    |            |            | family 2 (myo-inositol transporter), member |         |        |       |        |  |     |
| molecular_function | GO:0005351 | CNAG_05377 | 13                                          | 2.02    | 1.94   | -0.06 | 0.9292 |  |     |
|                    |            |            | MFS transporter, SP family, solute carrier  |         |        |       |        |  |     |
|                    |            |            | family 2 (myo-inositol transporter), member |         |        |       |        |  |     |
| molecular_function | GO:0005351 | CNAG_05381 | 13                                          | 15.77   | 0.75   | -4.39 | 0.0005 |  | yes |
| molecular_function | GO:0005351 | CNAG_05387 | galactose transporter                       | 2301.50 | 240.34 | -3.26 | 0.0005 |  | yes |
| molecular_function | GO:0005351 | CNAG_05471 | alpha-glucosidase                           | 14.37   | 5.88   | -1.29 | 0.0005 |  | yes |
| molecular_function | GO:0005351 | CNAG_05662 | sugar transporter                           | 1074.95 | 9.75   | -6.78 | 0.0005 |  | yes |
|                    |            |            | MFS transporter, SP family, solute carrier  |         |        |       |        |  |     |
|                    |            |            | family 2 (myo-inositol transporter), member |         |        |       |        |  |     |
| molecular_function | GO:0005351 | CNAG_05667 | 13                                          | 20.18   | 4.70   | -2.10 | 0.0005 |  | yes |
|                    |            |            | MFS transporter, SP family, general alpha   |         |        |       |        |  |     |
| molecular_function | GO:0005351 | CNAG_05914 | glucoside:H symporter                       | 26.40   | 7.79   | -1.76 | 0.0636 |  |     |
|                    |            |            | MFS transporter, SP family, general alpha   |         |        |       |        |  |     |
| molecular_function | GO:0005351 | CNAG_05929 | glucoside:H symporter                       | 17.00   | 4.35   | -1.97 | 0.0005 |  | yes |
|                    |            |            | MFS transporter, SP family, general alpha   |         |        |       |        |  |     |
| molecular_function | GO:0005351 | CNAG_05982 | glucoside:H symporter                       | 21.57   | 3.71   | -2.54 | 0.0005 |  | yes |
|                    |            |            | MFS transporter, SP family, general alpha   |         |        |       |        |  |     |
| molecular_function | GO:0005351 | CNAG_06259 | glucoside:H symporter                       | 2.70    | 1.95   | -0.47 | 0.3120 |  |     |
| molecular_function | GO:0005351 | CNAG_06290 | high-affinity glucose transporter SNF3      | 152.32  | 68.60  | -1.15 | 0.4054 |  |     |
| molecular_function | GO:0005351 | CNAG_06485 | hexose transporter protein                  | 7.86    | 5.94   | -0.40 | 0.3021 |  |     |
| molecular_function | GO:0005351 | CNAG_06521 | hypothetical protein                        | 8.43    | 6.36   | -0.41 | 0.2984 |  |     |
|                    |            |            | MFS transporter, SP family, general alpha   |         |        |       |        |  |     |
| molecular_function | GO:0005351 | CNAG_06527 | glucoside:H symporter                       | 1.41    | 0.40   | -1.81 | 0.0038 |  | yes |
| molecular_function | GO:0005351 | CNAG_06932 | sugar transporter                           | 32.10   | 0.69   | -5.53 | 0.0077 |  | yes |
| molecular_function | GO:0005351 | CNAG_06934 | hexose transporter protein                  | 17.56   | 5.06   | -1.79 | 0.0005 |  | yes |
| molecular_function | GO:0005351 | CNAG_06963 | sugar transporter                           | 11.06   | 65.50  | 2.57  | 0.0005 |  |     |
| molecular_function | GO:0005351 | CNAG_07641 | monosaccharide transporter                  | 20.10   | 4.58   | -2.13 | 0.0097 |  | yes |
| molecular_function | GO:0005351 | CNAG_07874 | sugar transporter                           | 122.59  | 1.76   | -6.12 | 0.0005 |  | yes |
